# Supplementary material
Source: MDPI journal article supplement (https://www.mdpi.com/2079-6412/5/3/557)
Supplement: s1 [file s1]

## Supplementary Materials

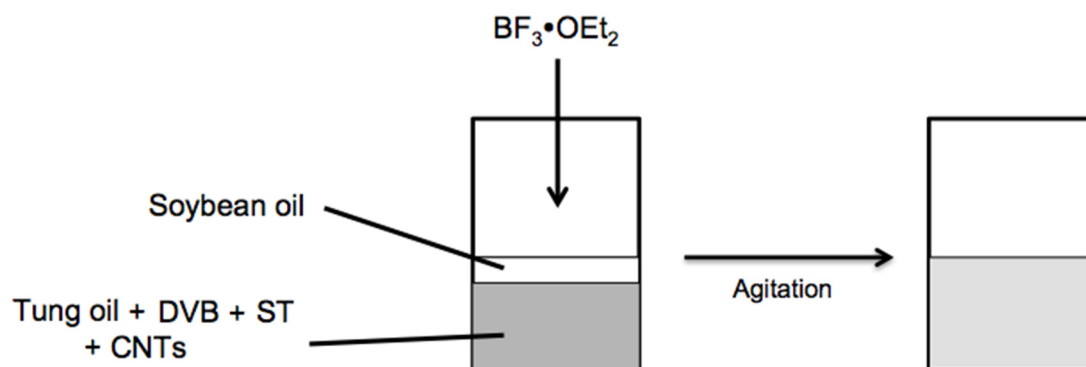

**Figure S1.** Sample preparation for the cationic polymerization of tung oil-based thermosetting resins.

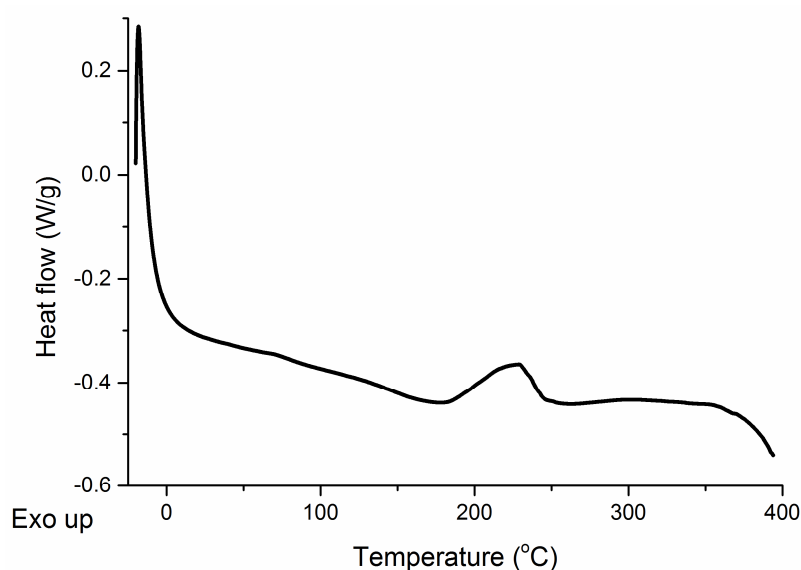

**Figure S2.** DSC curve of a tung oil-based resin reinforced with 0.25 wt % CNTs microwaved at 100 W for 10 min, followed by 200 W for 10 min, and a 1 h 30 min post-cure step at 140 °C in a convection oven.
